# Supplementary material for: Genome Sequencing-Based Evolutionary Prediction of Glycan-Adhering Lectins and Experimental Evaluation of a Lectin (FimH) Inhibitor Using an Enterohemorrhagic Escherichia coli Strain Isolated in Korea
Source: Research Square preprint supplement (doi:10.21203/rs.3.rs-1548018/v1), 2022-04-14
Supplement: Supplementary file 1 [file 9227f0f1e82193dc36f2ae91.xlsx]

## Sheet: Sheet1
Table.3. Putative adhesin genes of NCCP14539 and other strains.
NCCP14539	NCCP15738	NCCP15739	NCCP15736	NCCP15737
bamA	bamA	bamA	bamA	bamA
btuB	bamB	bamB	bamB	bamB
cusC	bamC	bamC	bamC	bamC
escC	bamD	bamD	bamD	bamD
fadL	bamE	bamE	bamE	bamE
fhuA	bglH	blc	bglH	blc
fhuE	blc	btuB	blc	btuB
gspD	btuB	cah	btuB	cdiA
hofQ	cirA	chuA	cdiA	cirA
iha	cusC	cirA	cirA	cusC
lamB	ecpC	cusC	cusC	ehaB
lpfC	ehaB	eae	ehaB	envC
mdtQ	elfC	ehaB	elfC	espP
ompA	envC	envC	envC	fadL
ompC	fadL	escC	fadL	fhuA
ompF	fdeC	escJ	fdeC	fhuE
ompG	fepA	espP	fhuA	fimD
ompN	fhuA	etpD	fhuE	fiu
ompT	fhuE	fadL	fimD	flgH
ompW	fimD	fdeC	fiu	gdhA
ompX	fiu	fepA	flgH	gspD
pal	flgH	fhuA	gdhA	hofQ
phoE	flgH	fhuE	gfcD	htrE
pldA	gdhA	fimD	gfcE	ireA
tamA	gfcE	fiu	gspD	lamB
tolC	gspD	flgH	hofQ	lpfC
uidC	hofQ	gdhA	htrE	lpp
ychO	htrE	gfcD	ireA	lptD
yfaL	lamB	gfcE	lamB	lptE
yfcU	lpp	hofQ	lpfC	mdtP
	lptD	iha	lpp	mdtQ
	lptE	lamB	lptD	mipA
	mdtP	lpp	lptE	mlaA
	mdtQ	lptD	mdtP	mltA
	mipA	lptE	mdtQ	nanC
	mlaA	mdtP	mipA	nfrA
	mltA	mdtQ	mlaA	nlpD
	nanC	mipA	mltA	nlpE
	nfrA	mlaA	nanC	ompA
	nlpD	mltA	nfrA	ompC
	nlpE	nanC	nlpD	ompG
	ompA	nfrA	nlpE	ompT
	ompC	nlpD	ompA	ompW
	ompC	nlpE	ompC	ompX
	ompF	ompA	ompC	pagP
	ompG	ompC	ompC	pal
	ompL	ompC	ompF	phoE
	ompN	ompF	ompG	pldA
	ompW	ompG	ompN	rcsF
	ompX	ompL	ompT	sfmD
	pagP	ompT	ompW	slp
	pal	ompW	ompX	slyB
	pcoB	ompX	pagP	tamA
	phoE	pagP	pal	tolC
	pldA	pal	phoE	traL
	rcsF	phoE	pldA	traN
	sfmD	pilO2	rcsF	traV
	silC	pldA	slp	tsx
	slp	rcsF	slyB	uidC
	slyB	sctC	tamA	wza
	tamA	sfmD	tolC	ychO
	tolC	slp	traL	yddB
	traJ	slyB	traN	yeaY
	traJ	tamA	traV	yehB
	traJ	tolC	tsx	yfaL
	traN	tsx	uidC	yfcU
	traN	wza	wza	yfiB
	traV	ybhC	ybgQ	ygeR
	tsx	ychO	ychO	yiaD
	uidC	yddB	yddB	yiaT
	wza	yeaY	yddL	yncD
	ybgQ	yehB	yeaY	yqhH
	ybhC	yfiB	yehB
	ychO	ygeR	yfaL
	yddB	yiaD	yfcU
	yddL	yiaT	yfiB
	yeaY	yjbH	ygeR
	yehB	yncD	yiaD
	yfaL	yqhH	yiaT
	yfcU	yraJ	yjbH
	yfiB		yncD
	ygeR		yqhH
	yhcD
	yiaT
	yjbH
	yncD
	yqhH
	yraJ
